# Supplementary material for: KLF4, a Key Regulator of a Transitive Triplet, Acts on the TGF-β Signaling Pathway and Contributes to High-Altitude Adaptation of Tibetan Pigs
Source: Front Genet. 2021 Apr 15;12:628192. doi: 10.3389/fgene.2021.628192 (PMC8082500; doi:10.3389/fgene.2021.628192)
Supplement: Supplementary Table 2 — List of tissue-specific genes for Tibetan pigs and Rongchang pigs. The first two columns in the table are the gene name and Ensembl ID. Columns 3–5 are the position coordinates of the gene. Columns 6–7 are information about the tissue-specific genes of Tibetan pigs, and the seventh column represents the TSI value of the Tibetan pig TS genes. Columns 8–9 are the information of Rongchang pig TS genes, and the ninth column represents the TSI value of the Rongchang pig TS genes. [file Table_2.XLSX]

## Sheet: Sheet1
Ensembl ID	Gene_name	Chromosome	Start	End	Specific expression tissue（Tibetan pig）	TSI(Tibetan pig)	Specific expression tissue（Rongchang pig）	TSI(Rongchang pig)
ENSSSCG00000006862	VCAM1	4	117496908	117511226	Spleen	0.980435	Spleen	0.971857
ENSSSCG00000006187	MSC	4	63709794	63713147	Spleen	0.97961	Spleen	0.974296
ENSSSCG00000022512	TRDC	7	76469954	76673728	Spleen	0.962283	Spleen	0.951601
ENSSSCG00000011579	PPARG	13	68302655	68433947	Spleen	0.954495	Spleen	0.930061
ENSSSCG00000023842	TRAT1	13	150614587	150667328	Spleen	0.95379	Spleen	0.945599
ENSSSCG00000006375	LY9	4	89701357	89729878	Spleen	0.94838	Spleen	0.930476
ENSSSCG00000022031	CHST2	13	83819416	83821780	Spleen	0.946104	Spleen	0.914759
ENSSSCG00000013144	MPEG1	2	12194341	12198352	Spleen	0.937385	Spleen	0.903192
ENSSSCG00000015094	CD3G	9	45645364	45704745	Spleen	0.935147	Spleen	0.900307
ENSSSCG00000006309	CD247	4	83458417	83586650	Spleen	0.934658	Spleen	0.931999
ENSSSCG00000013553	VAV1	2	72326714	72391648	Spleen	0.934495	Spleen	0.908341
ENSSSCG00000030156	APBB1IP	10	49124543	49189109	Spleen	0.929973	Spleen	0.940645
ENSSSCG00000003608	LCK	6	88720176	88745917	Spleen	0.928449	Spleen	0.913306
ENSSSCG00000016067	STK17B	15	100029994	100078779	Spleen	0.92729	Spleen	0.916417
ENSSSCG00000006736	CD2	4	103962319	103977292	Spleen	0.926577	Spleen	0.911208
ENSSSCG00000015093	CD3D	9	45637129	45644221	Spleen	0.926198	Spleen	0.910339
ENSSSCG00000006788	ADORA3	4	108814405	108873927	Spleen	0.925649	Spleen	0.915402
ENSSSCG00000010908	PTPRC	10	21466373	21764560	Spleen	0.920773	Spleen	0.921709
ENSSSCG00000011079	PIP4K2A	10	52223425	52408922	Spleen	0.920391	Spleen	0.900757
ENSSSCG00000014316	TGFBI	2	138191804	138225366	Spleen	0.91286	Spleen	0.913089
ENSSSCG00000012347	ALAS2	X	47871521	47896003	Spleen	0.905826	Spleen	0.905097
ENSSSCG00000023165	SEMA7A	7	59094932	59119534	Spleen	0.903349	Spleen	0.913477
ENSSSCG00000029239	MZB1	2	141277544	141279641	Spleen	0.979221	--	--
ENSSSCG00000015016	POU2AF1	9	39119012	39144606	Spleen	0.953057	--	--
ENSSSCG00000006378	SLAMF7	4	89759848	89785816	Spleen	0.944983	--	--
ENSSSCG00000015037	IL18	9	39834966	39873300	Spleen	0.927438	--	--
ENSSSCG00000025704	DENND2D	4	109121916	109142720	Spleen	0.924011	--	--
ENSSSCG00000023374	SRGN	14	72183363	72199254	Spleen	0.919582	--	--
ENSSSCG00000009517	GPR183	11	68231851	68245751	Spleen	0.918951	--	--
ENSSSCG00000021176	LPXN	2	12534840	12582745	Spleen	0.917333	--	--
ENSSSCG00000012909	PTPRCAP	2	5087256	5089359	Spleen	0.916043	--	--
ENSSSCG00000014725	HBB	9	4621187	4809453	Spleen	0.915708	--	--
ENSSSCG00000007800	SEPTIN1	3	17924651	17937953	Spleen	0.914414	--	--
ENSSSCG00000015671	ARHGAP15	15	8192605	8811795	Spleen	0.908093	--	--
ENSSSCG00000000137	NCF4	5	10874953	10994015	Spleen	0.90728	--	--
ENSSSCG00000026583	TLR1	8	30147621	30155466	Spleen	0.9031	--	--
ENSSSCG00000029651	SLN	9	36232968	36242405	Muscle	0.999496	Muscle	0.999711
ENSSSCG00000013022	PYGM	2	7391064	7421261	Muscle	0.994338	Muscle	0.995797
ENSSSCG00000016720	PGAM2	18	48693882	48713862	Muscle	0.992539	Muscle	0.99382
ENSSSCG00000013366	LDHA	2	40812453	40826715	Muscle	0.981363	Muscle	0.979413
ENSSSCG00000017904	ENO3	12	51954614	51963223	Muscle	0.975713	Muscle	0.980653
ENSSSCG00000009631	PEBP4	14	6966866	7173203	Muscle	0.974854	Muscle	0.988867
ENSSSCG00000005627	AK1	1	268355032	268365598	Muscle	0.974353	Muscle	0.98321
ENSSSCG00000003812	PGM1	6	148851183	148925741	Muscle	0.967844	Muscle	0.978395
ENSSSCG00000005713	PLPP7	1	271241205	271284585	Muscle	0.965357	Muscle	0.979476
ENSSSCG00000012411	PHKA1	X	58455938	58583216	Muscle	0.964572	Muscle	0.959994
ENSSSCG00000023267	SCN1B	6	44597713	44607490	Muscle	0.96378	Muscle	0.963659
ENSSSCG00000015720	BIN1	15	25328674	25383652	Muscle	0.960858	Muscle	0.968669
ENSSSCG00000015931	KLHL41	15	75852198	75895016	Muscle	0.960396	Muscle	0.97611
ENSSSCG00000015796	PDLIM3	15	46513234	46546504	Muscle	0.959171	Muscle	0.984986
ENSSSCG00000021129	PFKM	5	78475540	78526995	Muscle	0.954643	Muscle	0.952031
ENSSSCG00000012699	FHL1	X	111310684	111367904	Muscle	0.946235	Muscle	0.905726
ENSSSCG00000004570	TPM1	1	108986981	109019440	Muscle	0.943643	Muscle	0.960245
ENSSSCG00000000685	TPI1	5	63837506	63843137	Muscle	0.942334	Muscle	0.943102
ENSSSCG00000005316	TPM2	1	236402247	236410471	Muscle	0.942057	Muscle	0.960885
ENSSSCG00000000694	GAPDH	5	64129680	64133991	Muscle	0.941786	Muscle	0.9558
ENSSSCG00000006174	JPH1	4	61628299	61716546	Muscle	0.938997	Muscle	0.939811
ENSSSCG00000000633	YBX3	5	61337863	61361280	Muscle	0.938836	Muscle	0.958933
ENSSSCG00000013864	TMEM38A	2	60929049	60960467	Muscle	0.938665	Muscle	0.953226
ENSSSCG00000006872	AGL	4	118176241	118268835	Muscle	0.932232	Muscle	0.928932
ENSSSCG00000000214	GPD1	5	16007448	16017825	Muscle	0.930747	Muscle	0.95062
ENSSSCG00000013043	MACROD1	2	7939044	8087697	Muscle	0.9192	Muscle	0.958585
ENSSSCG00000027428	ENHO	10	32273086	32275114	Muscle	0.917699	Muscle	0.971979
ENSSSCG00000002467	ASB2	7	115207557	115258654	Muscle	0.916207	Muscle	0.94535
ENSSSCG00000002844	PHKB	6	36991241	37193587	Muscle	0.912214	Muscle	0.913541
ENSSSCG00000017186	RNF157	12	5226135	5307061	Muscle	0.907739	Muscle	0.921633
ENSSSCG00000012911	CARNS1	2	5097238	5112282	Muscle	0.907432	Muscle	0.92615
ENSSSCG00000009111	SYNPO2	8	104677580	104873791	Muscle	0.930262	--	--
ENSSSCG00000017607	TMEM100	12	32008007	32013981	Lung	0.970001	--	0.941397
ENSSSCG00000016031	CALCRL	15	92233269	92332385	Lung	0.959868	--	0.915216
ENSSSCG00000002366	NPC2	7	97730514	97740331	Lung	0.938773	Lung	0.961533
ENSSSCG00000000492	LYZ	5	33525744	33618242	Lung	0.935906	Lung	0.97823
ENSSSCG00000005055	LGALS3	1	184478710	184497951	Lung	0.929278	Lung	0.957487
ENSSSCG00000025858	ELN	3	11214073	11244897	Lung	0.914642	--	0.915649
ENSSSCG00000021606	FLVCR2	7	98718095	98823839	Lung	0.909701	--	0.915936
ENSSSCG00000023972	DRAM1	5	82290382	82325563	Lung	0.909022	Lung	0.909578
ENSSSCG00000014336	EGR1	2	140441421	140445296	Lung	0.972573	--	--
ENSSSCG00000002383	FOS	7	98449349	98455554	Lung	0.972339	--	--
ENSSSCG00000007073	ISM1	17	21948370	22037023	Lung	0.933627	--	--
ENSSSCG00000023333	FCN2	1	274103877	274111970	Lung	0.932723	--	--
ENSSSCG00000006940	CCN1	4	130392404	130395150	Lung	0.929714	--	--
ENSSSCG00000005437	KLF4	1	248604820	248609574	Lung	0.922125	--	--
ENSSSCG00000004948	SMAD6	1	164657086	164735083	Lung	0.921944	--	--
ENSSSCG00000017728	MYO1D	12	42120367	42489194	Lung	0.920773	--	--
ENSSSCG00000011020	JCAD	10	40951806	40997072	Lung	0.919132	--	--
ENSSSCG00000016665	BMPER	18	39412838	39950737	Lung	0.911224	--	--
ENSSSCG00000010332	PLAC9	14	81889283	81901817	Lung	0.909196	--	--
ENSSSCG00000013735	JUNB	2	66214594	66215637	Lung	0.907508	--	--
ENSSSCG00000011186	COL6A5	13	2029946	2174384	Lung	0.90425	--	--
ENSSSCG00000001914	LOXL1	7	59481412	59505149	Lung	0.904011	--	--
ENSSSCG00000011799	AHSG	13	124426308	124438840	Liver	0.999625	Liver	0.999652
ENSSSCG00000005485	AMBP	1	254683885	254703225	Liver	0.999335	Liver	0.999373
ENSSSCG00000023686	TTR	6	115496193	115503977	Liver	0.99922	Liver	0.998494
ENSSSCG00000010479	RBP4	14	105036770	105044765	Liver	0.998966	Liver	0.994281
ENSSSCG00000011801	HRG	13	124505303	124516384	Liver	0.998301	Liver	0.998165
ENSSSCG00000011147	AKR1C2	10	65576464	65678248	Liver	0.996335	Liver	0.994609
ENSSSCG00000011640	TF	13	74930655	74970599	Liver	0.993616	Liver	0.995687
ENSSSCG00000011700	CP	13	89396685	89463538	Liver	0.99238	Liver	0.993527
ENSSSCG00000016856	C9	16	24525394	24588030	Liver	0.991869	Liver	0.964917
ENSSSCG00000014219	CDO1	2	119892691	119940665	Liver	0.990915	Liver	0.983322
ENSSSCG00000030921	APOA1	9	44216393	44218978	Liver	0.990165	Liver	0.98739
ENSSSCG00000011453	ITIH4	13	34915855	34948229	Liver	0.986191	Liver	0.992747
ENSSSCG00000003088	APOE	6	51372259	51377794	Liver	0.984935	Liver	0.962461
ENSSSCG00000015661	C4BPB	9	67698797	67725783	Liver	0.981299	Liver	0.976105
ENSSSCG00000011451	ITIH3	13	34892369	34937568	Liver	0.979796	Liver	0.991809
ENSSSCG00000003201	ATF5	6	54945119	54950137	Liver	0.977433	Liver	0.962277
ENSSSCG00000010631	GPAM	14	122538600	122724131	Liver	0.971707	Liver	0.942552
ENSSSCG00000029066	IDI1	10	68534796	68539279	Liver	0.969725	Liver	0.919672
ENSSSCG00000024015	FADS1	2	9735293	9749671	Liver	0.969661	Liver	0.921865
ENSSSCG00000013004	TM7SF2	2	7076778	7081429	Liver	0.967189	Liver	0.967111
ENSSSCG00000008857	MSMO1	8	43726855	43744714	Liver	0.966764	Liver	0.923255
ENSSSCG00000000856	PAH	5	81236096	81463452	Liver	0.965238	Liver	0.980685
ENSSSCG00000029606	AOX1	15	104153702	104238400	Liver	0.96514	Liver	0.967385
ENSSSCG00000000368	MMP19	5	21280130	21285774	Liver	0.963312	Liver	0.940239
ENSSSCG00000017226	FADS6	12	6353687	6368985	Liver	0.960596	Liver	0.961394
ENSSSCG00000006289	F5	4	81403232	81485055	Liver	0.956617	Liver	0.956656
ENSSSCG00000021181	DHCR7	2	2377416	2391448	Liver	0.955551	Liver	0.94782
ENSSSCG00000015535	QSOX1	9	121779796	121837437	Liver	0.955551	Liver	0.954343
ENSSSCG00000012676	MBNL3	X	108489557	108612875	Liver	0.955526	Liver	0.961374
ENSSSCG00000013551	C3	2	72431499	72528112	Liver	0.954316	Liver	0.96231
ENSSSCG00000023142	GAMT	2	77076566	77079766	Liver	0.952214	Liver	0.924305
ENSSSCG00000024476	CES3	6	27612681	27638760	Liver	0.942384	Liver	0.938822
ENSSSCG00000012394	GJB1	X	57196999	57249886	Liver	0.941319	--	0.932971
ENSSSCG00000016836	NADK2	16	21506769	21557274	Liver	0.9386	Liver	0.905678
ENSSSCG00000001989	CIDEB	7	74982306	74985775	Liver	0.9371	Liver	0.968176
ENSSSCG00000001427	C4A	7	24067995	24083065	Liver	0.924765	Liver	0.919036
ENSSSCG00000009144	ETNPPL	8	113363049	113384783	Liver	0.919902	Liver	0.974201
ENSSSCG00000016174	FN1	15	117658099	117731014	Liver	0.91686	Liver	0.931048
ENSSSCG00000029533	SEMA4G	14	111996792	112068251	Liver	0.91555	Liver	0.944506
ENSSSCG00000001422	C2	7	23995982	24034040	Liver	0.913335	Liver	0.911393
ENSSSCG00000005785	PCSK6	1	145508636	145697009	Liver	0.912969	Liver	0.933994
ENSSSCG00000010948	CTSL	10	27668264	27674618	Liver	0.911765	Lung	0.980937
ENSSSCG00000017256	ABCA6	12	11225272	11319480	Liver	0.906721	Liver	0.91031
ENSSSCG00000015616	HSD11B1	9	133231451	133278396	Liver	0.941369	--	--
ENSSSCG00000028517	SC5D	9	48357145	48372388	Liver	0.937392	--	--
ENSSSCG00000014369	CD14	2	142346358	142349581	Liver	0.920649	--	--
ENSSSCG00000009668	CLU	14	11336590	11352475	Liver	0.915566	--	--
ENSSSCG00000027525	DHCR24	6	157483783	157579161	Liver	0.906741	--	--
ENSSSCG00000016872	HMGCS1	16	27936217	27957194	Liver	0.902989	--	--
ENSSSCG00000010554	SCD	14	111461560	111478031	Liver	0.90101	--	--
ENSSSCG00000009132	ENPEP	8	111748514	111858510	Kidney	0.991161	Kidney	0.993483
ENSSSCG00000014927	NOX4	9	22624195	22776554	Kidney	0.986162	Kidney	0.988243
ENSSSCG00000022009	DDC	9	136495891	136571197	Kidney	0.983427	Kidney	0.975067
ENSSSCG00000011723	MME	13	95019081	95126045	Kidney	0.982106	Kidney	0.985175
ENSSSCG00000008943	SLC4A4	8	67706880	68290496	Kidney	0.979568	Kidney	0.979421
ENSSSCG00000009268	CRYL1	11	845466	931649	Kidney	0.974589	Kidney	0.972316
ENSSSCG00000012651	XPNPEP2	X	106333825	106363641	Kidney	0.967344	Kidney	0.974781
ENSSSCG00000025423	KCNK5	7	34617956	34656697	Kidney	0.965866	Kidney	0.945533
ENSSSCG00000011326	PTH1R	13	29753308	29775371	Kidney	0.96358	Kidney	0.965994
ENSSSCG00000000061	PMM1	5	6964999	6975904	Kidney	0.952085	Kidney	0.942948
ENSSSCG00000000111	BAIAP2L2	5	9778727	9799703	Kidney	0.94807	Kidney	0.950075
ENSSSCG00000006140	CA2	4	51193755	51211259	Kidney	0.945826	Kidney	0.902997
ENSSSCG00000005944	NDRG1	4	8014446	8069333	Kidney	0.94557	Kidney	0.923176
ENSSSCG00000010691	PLPP4	14	130276639	130562563	Kidney	0.944327	Kidney	0.940536
ENSSSCG00000022635	BEX4	X	84147183	84149092	Kidney	0.942902	Kidney	0.948587
ENSSSCG00000026423	SLC23A1	2	141258323	141276442	Kidney	0.940518	Kidney	0.925819
ENSSSCG00000002135	PNP	7	78424740	78446997	Kidney	0.939392	Kidney	0.944353
ENSSSCG00000016857	DAB2	16	24514722	24776903	Kidney	0.937132	Kidney	0.913491
ENSSSCG00000009233	GPAT3	8	134912491	134977395	Kidney	0.932281	Kidney	0.9136
ENSSSCG00000005361	ALDH1B1	1	239110018	239114728	Kidney	0.930755	Kidney	0.949409
ENSSSCG00000012525	BEX1	X	84222954	84224613	Kidney	0.930726	Kidney	0.966552
ENSSSCG00000004478	MYO6	1	89992866	90137734	Kidney	0.930047	Kidney	0.921439
ENSSSCG00000010523	HOGA1	14	108959134	108986726	Kidney	0.925749	Kidney	0.925504
ENSSSCG00000017861	ASPA	12	49610519	49641905	Kidney	0.922364	Kidney	0.951681
ENSSSCG00000006296	ATP1B1	4	81911558	81997714	Kidney	0.921651	Kidney	0.925079
ENSSSCG00000007157	SLC4A11	17	32446471	32459398	Kidney	0.917752	Kidney	0.948481
ENSSSCG00000024223	ARHGEF16	6	65026521	65048512	Kidney	0.915618	Kidney	0.905599
ENSSSCG00000009500	CLDN10	11	65027732	65147242	Kidney	0.915253	Kidney	0.939691
ENSSSCG00000011400	SEMA3B	13	32740802	32749622	Kidney	0.91488	Kidney	0.936776
ENSSSCG00000003951	C1orf210	6	167960094	167963587	Kidney	0.913516	Kidney	0.926782
ENSSSCG00000023186	CA4	12	37962943	37972509	Kidney	0.908207	Kidney	0.919234
ENSSSCG00000003491	AKR7A2	6	77754173	77761667	Kidney	0.90598	Kidney	0.916402
ENSSSCG00000028878	BCAR1	6	12367758	12404822	Kidney	0.905028	Kidney	0.90133
ENSSSCG00000030305	SLC15A2	13	138595954	138681573	Kidney	0.904858	Kidney	0.908702
ENSSSCG00000022953	PTER	10	45361713	45440215	Kidney	0.903805	Kidney	0.914291
ENSSSCG00000001493	PRIM2	7	28274626	28631514	Kidney	0.945419	--	--
ENSSSCG00000010210	SLC16A9	14	63026663	63108997	Kidney	0.943199	--	--
ENSSSCG00000002032	SLC7A8	7	75854882	75921931	Kidney	0.934979	--	--
ENSSSCG00000021624	LAD1	10	23766872	23778654	Kidney	0.930721	--	--
ENSSSCG00000029438	SESN2	6	85324228	85348044	Kidney	0.917899	--	--
ENSSSCG00000012926	PC	2	5518430	5587797	Kidney	0.916781	--	--
ENSSSCG00000009709	MFAP3L	14	19825115	20034763	Kidney	0.916697	--	--
ENSSSCG00000003687	EPB41L3	6	101420396	101671170	Kidney	0.913234	--	--
ENSSSCG00000027486	TRIP6	3	8712126	8716873	Kidney	0.905144	--	--
ENSSSCG00000017495	GRB7	12	22574584	22584760	Kidney	0.90492	--	--
ENSSSCG00000008991	FRAS1	8	73502664	73958083	Kidney	0.900681	--	--
ENSSSCG00000014060	KIAA1191	2	81520408	81539621	Kidney	0.90052	--	--
ENSSSCG00000004803	ACTC1	1	136281167	136286545	Heart	0.997087	Heart	0.996911
ENSSSCG00000011090	NEBL	10	53604600	53958047	Heart	0.994412	Heart	0.992494
ENSSSCG00000022815	PYGB	17	30940452	30995695	Heart	0.968826	Heart	0.962484
ENSSSCG00000010142	RYR2	14	53652245	54406355	Heart	0.968192	Heart	0.980511
ENSSSCG00000010461	ANKRD1	14	102603777	102612839	Heart	0.966737	Heart	0.98276
ENSSSCG00000006745	CASQ2	4	104918501	104999787	Heart	0.966413	Heart	0.974792
ENSSSCG00000024305	MT3	6	18634721	18789137	Heart	0.960507	Heart	0.924461
ENSSSCG00000010800	B3GALT2	10	613608	624131	Heart	0.955394	Heart	0.966416
ENSSSCG00000020783	SLC41A1	9	66473341	66499805	Heart	0.934681	Heart	0.943547
ENSSSCG00000015879	DAPL1	15	65806070	65820450	Heart	0.93017	Heart	0.941024
ENSSSCG00000000528	PKP2	5	41424845	41508868	Heart	0.927509	Heart	0.913202
ENSSSCG00000027935	FHOD3	6	120036838	120586849	Heart	0.927485	Heart	0.906505
ENSSSCG00000022364	CPT1B	5	151906	163546	Heart	0.927274	Heart	0.942487
ENSSSCG00000002684	CDH13	6	4808255	5832188	Heart	0.924526	Heart	0.925027
ENSSSCG00000016620	TSPAN12	18	26046703	26112923	Heart	0.922097	Heart	0.965963
ENSSSCG00000030278	MLLT11	4	98164616	98171656	Heart	0.91679	Heart	0.923375
ENSSSCG00000011755	NCEH1	13	111139621	111248140	Heart	0.91539	Heart	0.903624
ENSSSCG00000031053	S100A1	4	95993938	96012402	Heart	0.908699	Heart	0.9639
ENSSSCG00000001716	RCAN2	7	40980523	41227021	Heart	0.906489	Heart	0.93061
ENSSSCG00000022895	CRYBG3	13	162355469	162478720	Heart	0.922652	--	--
ENSSSCG00000015045	NCAM1	9	40628750	40960608	Heart	0.914482	--	--
ENSSSCG00000004241	GJA1	1	40988515	41002137	Heart	0.910596	--	--
ENSSSCG00000008147	FHL2	3	49363555	49467527	Heart	0.903614	--	--
ENSSSCG00000010400	MSMB	14	90533103	90582765	--	0.931184	--	0.943922
ENSSSCG00000013302	CAT	2	26487653	26581452	--	0.925941	--	0.904614
ENSSSCG00000028996	ALDH1A1	1	226161296	226217312	--	0.919243	Liver	0.910376
ENSSSCG00000023684	MT1A	6	18660642	18673766	--	0.914649	Liver	0.985694
ENSSSCG00000030626	ALDH1L1	7	53748585	53794706	--	0.903048	--	0.914747
ENSSSCG00000001439	GPSM3	7	24227573	24229985	--	0.900822	Spleen	0.903714
ENSSSCG00000003578	FGR	6	84809542	84830361	--	0.949611	--	--
ENSSSCG00000008976	ART3	8	71673799	71795344	--	0.927879	--	--
ENSSSCG00000017062	TIMD4	16	66253604	66292961	--	0.927788	--	--
ENSSSCG00000010639	HABP2	14	123893989	123932962	--	0.918877	--	--
ENSSSCG00000012652	SASH3	X	106373957	106389449	--	0.91274	--	--
ENSSSCG00000000232	ACVRL1	5	17263907	17286276	--	0.911257	--	--
ENSSSCG00000003592	SDC3	6	87495041	87535845	--	0.911015	--	--
ENSSSCG00000028711	CASP1	9	35186420	35200328	--	0.905504	--	--
ENSSSCG00000010476	MYOF	14	104767783	104941357	--	0.905015	--	--
ENSSSCG00000030680	TCF7	2	136422712	136458037	--	0.900767	--	--
ENSSSCG00000001906	CYP1A1	7	58780105	58809755	--	--	Liver	0.995075
ENSSSCG00000011397	SLC38A3	13	32683191	32704535	--	--	Liver	0.954956
ENSSSCG00000011721	P2RY1	13	92991043	92997700	--	--	Muscle	0.94049
ENSSSCG00000009661	ADRA1A	14	10626293	10733069	--	--	Liver	0.928504
ENSSSCG00000010772	ADAM8	14	141221197	141232306	--	--	Lung	0.927727
ENSSSCG00000017521	SCRN2	12	24090685	24095130	--	--	Kidney	0.925414
ENSSSCG00000016578	FLNC	18	19759738	19787618	--	--	Muscle	0.924875
ENSSSCG00000007435	PLTP	17	48089785	48101515	--	--	Lung	0.918905
ENSSSCG00000015595	ATF3	9	130770428	130787462	--	--	Muscle	0.918788
ENSSSCG00000004181	VNN1	1	31000254	31059345	--	--	--	0.918017
ENSSSCG00000006717	PHGDH	4	101408308	101478144	--	--	Kidney	0.917856
ENSSSCG00000014880	AQP11	9	12065546	12078401	--	--	Kidney	0.9166
ENSSSCG00000015391	CROT	9	93258619	93308151	--	--	Liver	0.913746
ENSSSCG00000027013	CYP4F8	2	61889495	61917929	--	--	Kidney	0.913327
ENSSSCG00000016855	FYB1	16	24333032	24507740	--	--	Spleen	0.913309
ENSSSCG00000021084	S100A6	4	96098283	96099685	--	--	--	0.912536
ENSSSCG00000022178	NUMB	7	96624260	96799975	--	--	Kidney	0.91072
ENSSSCG00000010184	AGT	14	59643292	59672428	--	--	Liver	0.910267
ENSSSCG00000006740	ATP1A1	4	104353506	104384606	--	--	Kidney	0.910066
ENSSSCG00000006748	TSPAN2	4	105502552	105542119	--	--	Heart	0.909701
ENSSSCG00000013181	SERPING1	2	13324158	13338663	--	--	Liver	0.909601
ENSSSCG00000017885	SMTNL2	12	50582243	50602711	--	--	Muscle	0.908314
ENSSSCG00000011521	PDZRN3	13	54659589	54904900	--	--	Muscle	0.907928
ENSSSCG00000008162	IL1R1	3	52192914	52288515	--	--	Liver	0.907473
ENSSSCG00000017008	DOCK2	16	53843248	54248638	--	--	Spleen	0.907264
ENSSSCG00000000084	ATF4	5	8738880	8745225	--	--	Muscle	0.907098
ENSSSCG00000016570	TSPAN33	18	19491332	19514361	--	--	Kidney	0.906814
ENSSSCG00000008294	ACTG2	3	69096782	69121349	--	--	Spleen	0.906726
ENSSSCG00000012960	CST6	2	6323737	6325477	--	--	Kidney	0.906531
ENSSSCG00000022092	CYP7B1	4	69616035	69806496	--	--	Liver	0.906025
ENSSSCG00000016009	ITGA4	15	86947021	87029777	--	--	Spleen	0.905939
ENSSSCG00000013579	CD209	2	71394390	71397969	--	--	Lung	0.905434
ENSSSCG00000004679	SORD	1	126655135	126700858	--	--	--	0.904709
ENSSSCG00000026554	PRXL2B	6	64432148	64435320	--	--	Muscle	0.904645
ENSSSCG00000001073	TPMT	7	13820866	13846012	--	--	Kidney	0.903748
ENSSSCG00000016613	AASS	18	24974816	25039196	--	--	--	0.902907
ENSSSCG00000006287	SELL	4	81306373	81326778	--	--	Spleen	0.902196
ENSSSCG00000006702	FMO5	4	100336980	100374370	--	--	--	0.901469
ENSSSCG00000022034	SMYD3	10	18267603	19019537	--	--	Heart	0.901273
ENSSSCG00000028317	ARHGEF28	2	82761355	83102123	--	--	Kidney	0.901075
ENSSSCG00000009844	HSPB8	14	33626128	33640792	--	--	Muscle	0.900804
ENSSSCG00000012970	CTSW	2	6446105	6450360	--	--	Spleen	0.900716
